# Supplementary material
Source: publisher figshare collection journal article supplement (https://tandf.figshare.com/ndownloader/files/16974146)
Supplement: Supplementary file 1 [file 16974146]

**Supplementary Figure S1: Effect of ARBs on CrCl in patients with hypertension and CKD**


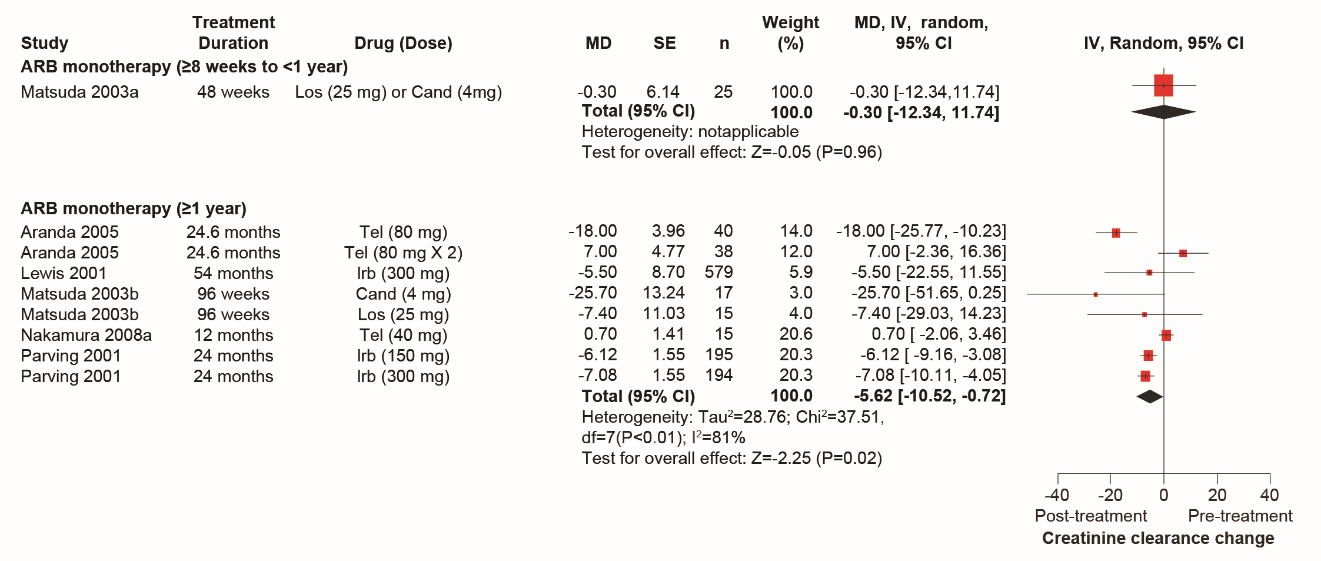


Aml, amlodipine; ARB, angiotensin receptor blocker; Cand, candesartan; CI, confidence interval; CKD, chronic kidney disease; CrCl, creatinine clearance; IV, inverse variance; Los, losartan; MD, mean difference; SE, standard error; Tel, telmisartan; val, valsartan

**Supplementary Figure S2: Impact of treatment duration on SBP changes**


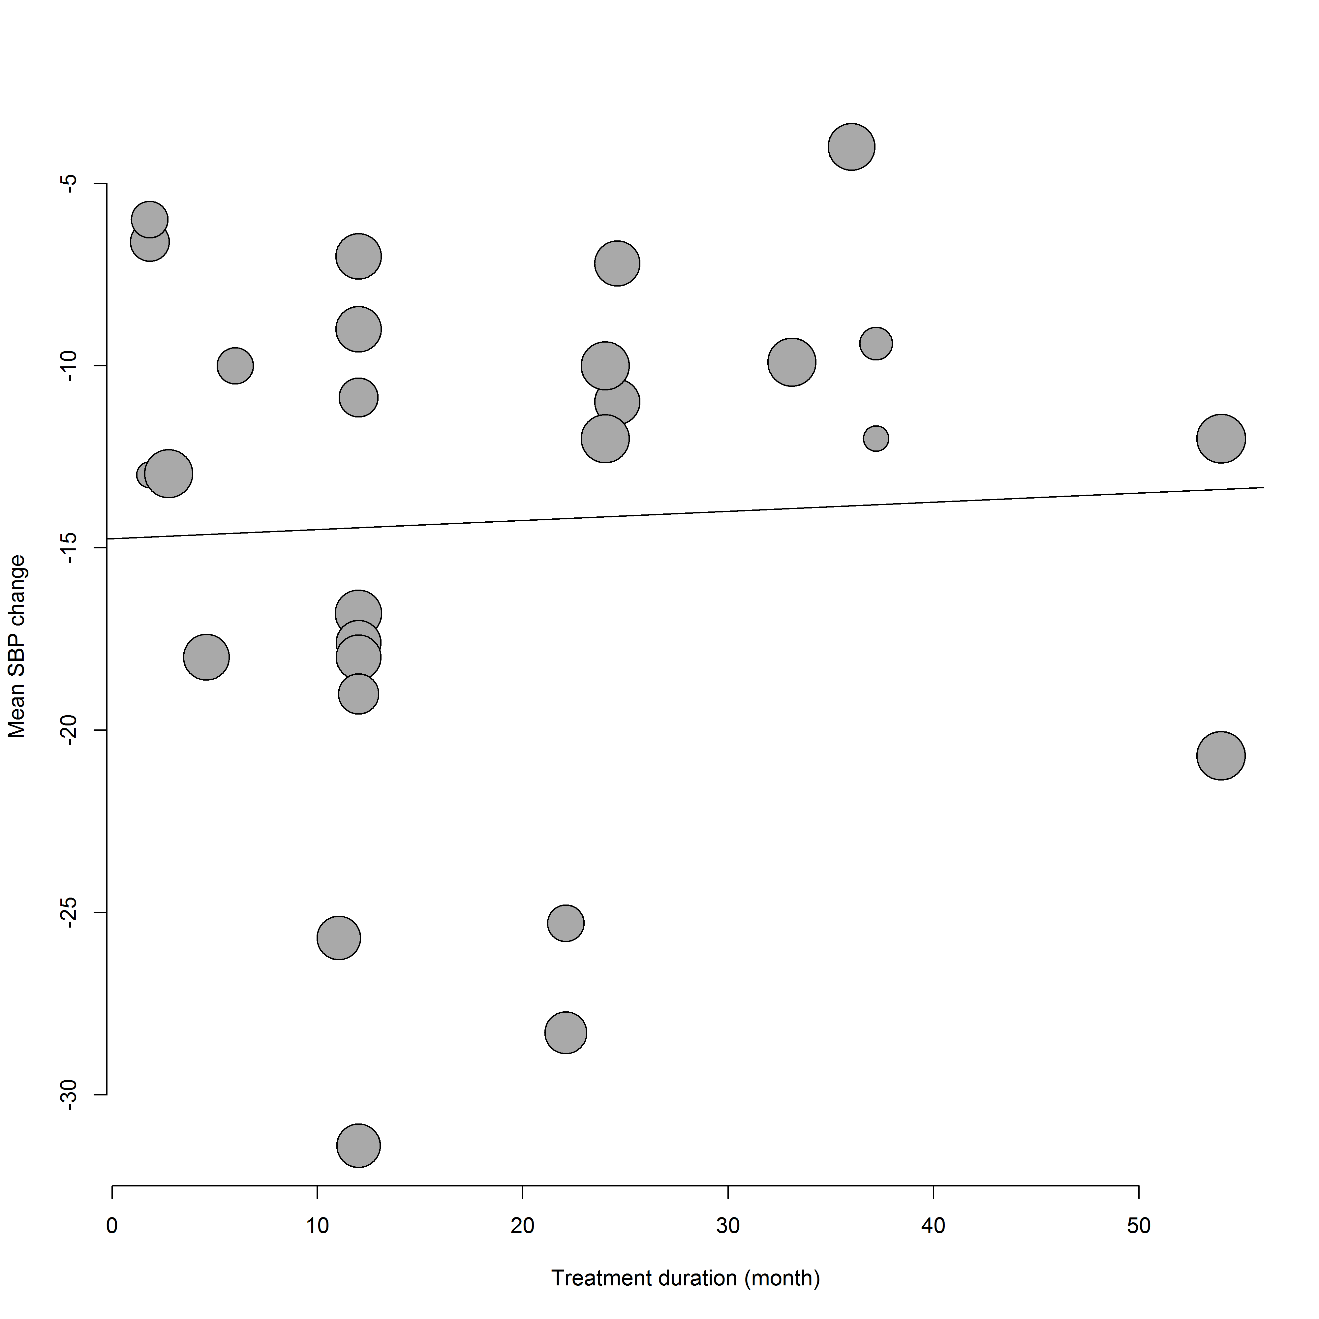
SBP, systolic blood pressure

**Supplementary Figure S3:** **Impact of SBP changes on eGFR changes**


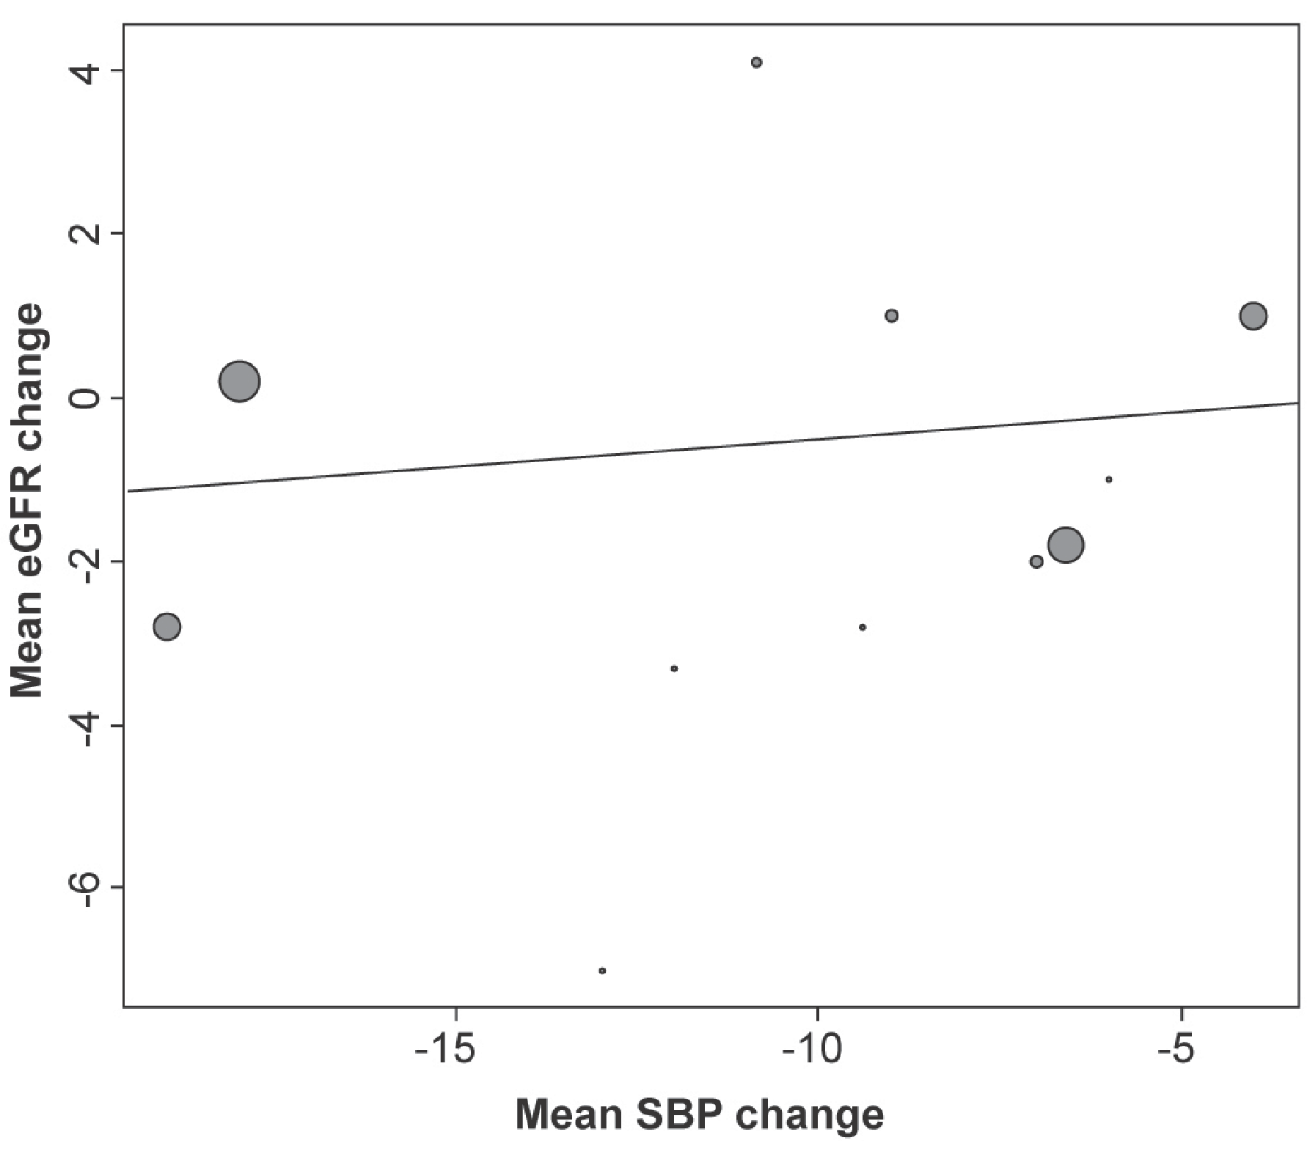


eGFR, estimated glomerular filtration rate; SBP, systolic blood pressure

**Supplementary Figure S4: Overall risk of bias in the published studies**


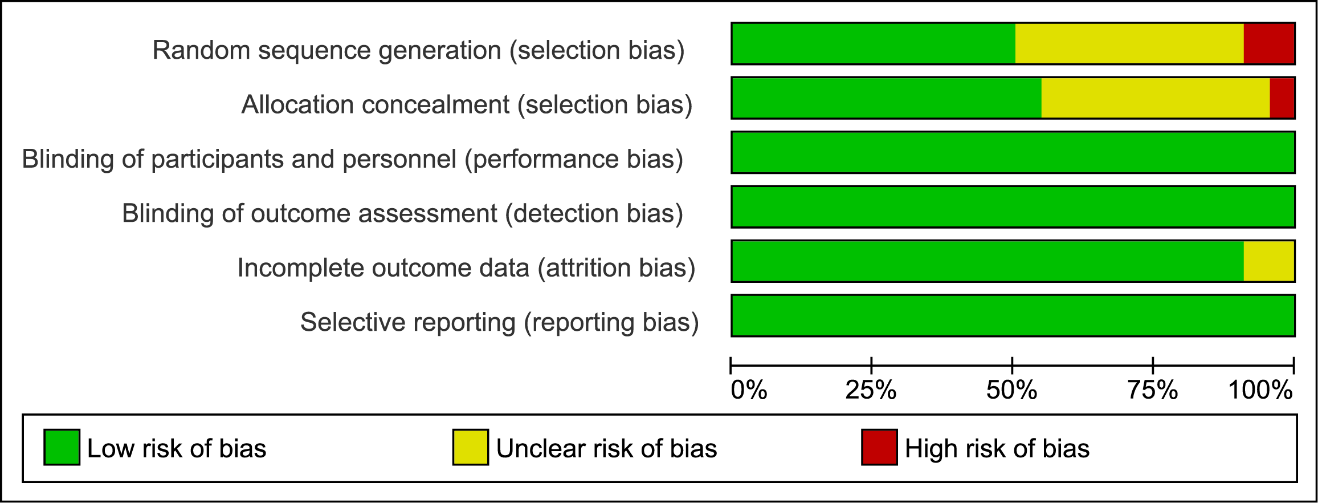


**Supplementary Figure S5:** **Summary of risk of bias in each study used in the meta-analysis**


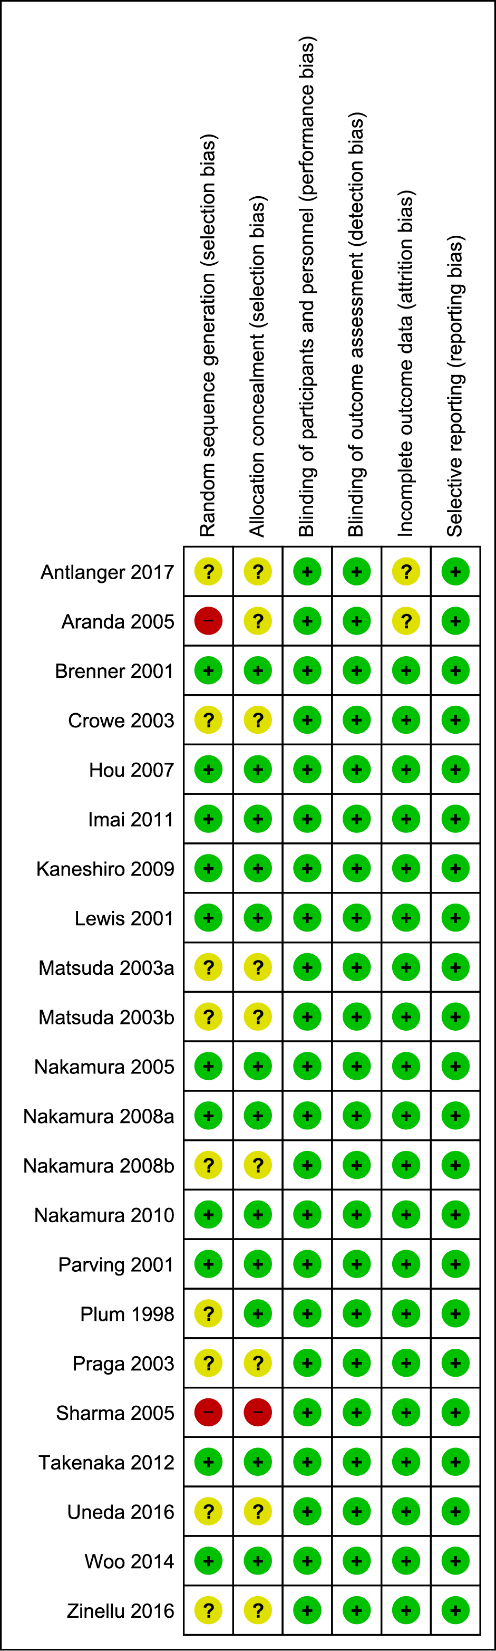


Reviewers’ judgments for each component study: green indicates a low risk of bias, yellow indicates an unclear risk of bias, and red indicates a high risk of bias.
